# Supplementary material for: Optimization of Catheter Based rtPA Thrombolysis in a Novel In Vitro Clot Model for Intracerebral Hemorrhage
Source: Biomed Res Int. 2017 Mar 26;2017:5472936. doi: 10.1155/2017/5472936 (PMC5385248; doi:10.1155/2017/5472936)
Supplement: Supplementary file 1 — This flowchart illustrates the experimental workflow of establishing an in vitro clot model and the further stepwise investigations and their key results. [file 5472936.f1.pdf]

### 1. Reliability of the Clot Model:

- 44 Clots: reliable clot- and liquid serum-part weight

### 2. Spontaneous Thrombolysis, Carrier Effect and rtPA Lysis:

- Group 1: drain only
- Group 2: 5 ml 0.9% NaCl
- Group 3: 5 ml with 3mg rtPA

**Optimal treatment: rtPA**

### 3. Dose-response relationship:

- rtPA (0.5; 0.9; 1.2; 2; 3 mg) tested by clots of 25 ml
- rtPA (0.5; 0.9; 1.2; 2; 3 mg) tested by clots of 50 ml

**Optimal dose: 1 mg independent from clot size**

### 4. Optimal Treatment Time:

Clots treated 5, 15, 30 and 60 min with optimal dose of 1 mg rtPA

**Optimal treatment time: 15 min**

### Effectiveness of rtPA in different aged Clots:

1.5 h, 24h and 48h old clots treated with 1 mg rtPA with an optimal treatment time of 15 min repetetively for four times.

**rtPA is less effective in old clots**
